# Supplementary material for: Light-Driven Preparation, Microstructure, and Visible-Light Photocatalytic Property of Porous Carbon-Doped TiO2
Source: Hindawi journal article supplement (doi:10.1155/2012/720183), 2012-01-01
Supplement: f1 [file 720183.f1.pdf]

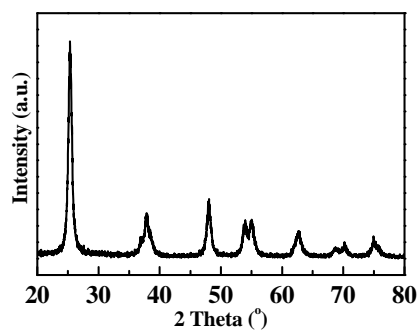

**Figure S1.** XRD pattern of N-TiO<sub>2</sub>.

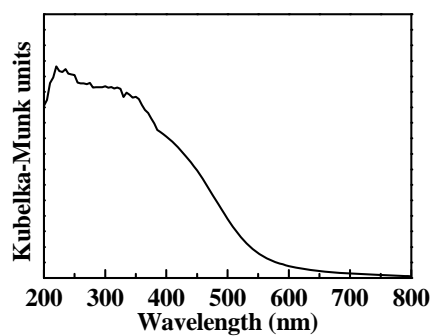

**Figure S2.** UV/vis diffuse reflectance spectrum of N-TiO<sub>2</sub>.

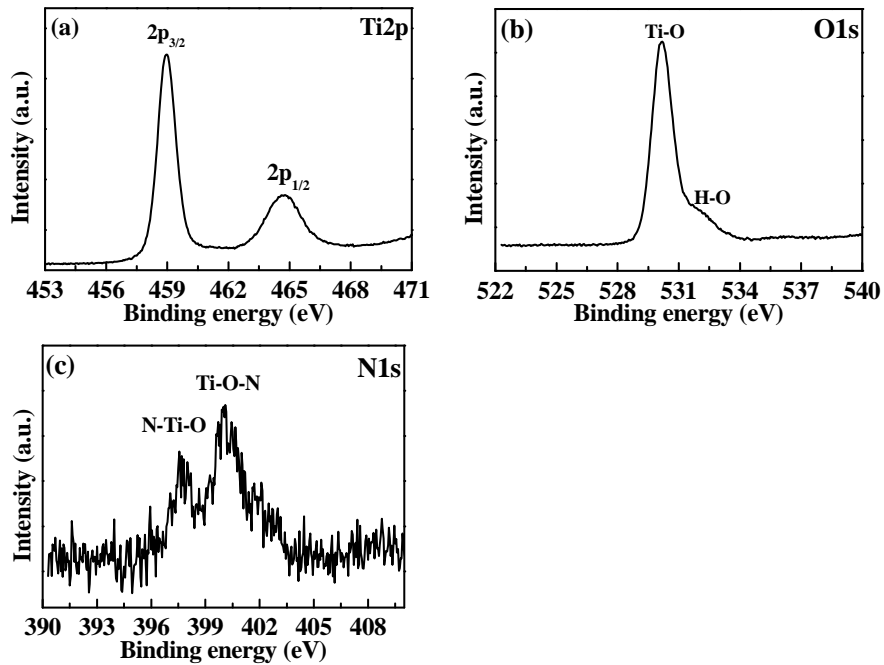

**Figure S3.** High-resolution XPS spectra of a) Ti2p, b) O1s and c) N1s for N-TiO<sub>2</sub>.
